# Supplementary material for: The Homocysteine and Metabolic Syndrome: A Mendelian Randomization Study
Source: MDPI journal article supplement (doi:10.3390/nu13072440), 2021-07-16
Supplement: s1 [file s1]

Table S1. Summary of two independent Korean cohorts (HEXA and CAVAS) on MetS status.

| Variables              | HEXA             |                      |         | CAVAS             |                    |         |
|------------------------|------------------|----------------------|---------|-------------------|--------------------|---------|
|                        | CASE<br>(N=676)  | Control<br>(n=3,017) | p-value | CASE<br>(n=1,052) | Control<br>(n=764) | p-value |
| Female, %              | 45.6             | 57.6                 | <0.01   | 49.6              | 65.4               | <0.01   |
| Age, years             | 57(50,64)        | 51(46,58)            | <0.01   | 62(55,65)         | 64(61,66)          | 0.92    |
| BMI, kg/m <sup>2</sup> | 26(24.5,27.8)    | 23.3(21.7,25.1)      | <0.01   | 25.7(23.8,27.6)   | 22.9(21.1,24.7)    | <0.01   |
| WC, cm                 | 91(86,95)        | 81(75,86)            | <0.01   | 89.75(84,95)      | 82(77,87)          | <0.01   |
| FAG, mmol/L            | 98(89,116)       | 89(83,95)            | <0.01   | 115.5(94,140)     | 92(86,104)         | <0.01   |
| TG, mmol/L             | 174(129,226)     | 92(65,128)           | <0.01   | 179(132,247)      | 104(80,135)        | <0.01   |
| HDL-C, mmol/L          | 44(38,49)        | 55(48,64)            | <0.01   | 40(35,46)         | 49(43,56)          | <0.01   |
| BP, mmHg               |                  |                      |         |                   |                    |         |
| Systolic               | 130(120.5,138.5) | 120(110,130)         | <0.01   | 138(126,150)      | 130(118,140)       | <0.01   |
| Diastolic              | 80(75,90)        | 78.5(70,80)          | <0.01   | 87(80,90)         | 80(74,90)          | <0.01   |
| T2D, %                 | 156 (23.08)      | 93(3.07)             | <0.01   | 537(51.09)        | 119(15.58)         | <0.01   |

Continuous variables were described as or median (interquartile range) and categorical variables as %. P value were calculated by Wilcoxon rank-sum test for continuous variables and chi-square test for categorical variables. BMI, body mass index; WC, waist circumference; FAG, fast glucose; TG, triglyceride; BP, blood pressure; T2D, type 2 diabetes.

Table S2. Summary of genotyping and quality control for outcome data.

| Study | Genotype Array                                      | Sample QC criteria                 | SNP QC criteria                            | Final Sample Size for Statistical Analysis |
|-------|-----------------------------------------------------|------------------------------------|--------------------------------------------|--------------------------------------------|
| HEXA  | Affymetrix<br>Genome-Wide<br>Human SNP array<br>6.0 | more than one<br>missing phenotype | SNP call rate <95%;<br>HWE p-value < 10E-6 | 3,693 (case: 676,<br>control: 3,017)       |
| CAVAS | Affymetrix<br>Genome-Wide<br>Human SNP array<br>6.0 | more than one<br>missing phenotype | SNP call rate <95%;<br>HWE p-value < 10E-6 | 1,814(case: 1,052,<br>control: 764)        |

Table S3. The association between metabolic syndrome and potential confounders in KARE cohort.

| Confounders | OR(95% CI)       | p-value |
|-------------|------------------|---------|
| Smoking     | 1.08 (0.97,1.2)  | 0.15    |
| Drinking    | 0.96 (0.9,1.03)  | 0.32    |
| RFS         | 0.99 (0.98,1.00) | 0.30    |
| PA          | 0.99 (0.99,1.00) | 0.42    |
| BMI         | 1.36 (1.32,1.39) | <0.01   |

All is adjusted by age, sex and area. RFS, recommended food score; PA, physical activity; BMI, body mass index.

Table S4. Instrumental variables associated with blood Hcy and MetS.

| SNP        | Chr | Position  | beta.ex | se.ex | p-value  | MAF   |
|------------|-----|-----------|---------|-------|----------|-------|
| rs11121828 | 1   | 11757041  | -0.036  | 0.006 | 4.74E-09 | 0.810 |
| rs4845882  | 1   | 11765754  | -0.039  | 0.008 | 2.74E-10 | 0.820 |
| rs12404124 | 1   | 11796456  | -0.037  | 0.006 | 1.35E-09 | 0.810 |
| rs198391   | 1   | 11799004  | -0.038  | 0.006 | 7.26E-10 | 0.810 |
| rs2076001  | 1   | 11801854  | -0.047  | 0.008 | 5.67E-09 | 0.900 |
| rs12567136 | 1   | 11806318  | -0.049  | 0.008 | 3.23E-10 | 0.900 |
| rs2076003  | 1   | 11806734  | -0.046  | 0.008 | 9.30E-09 | 0.900 |
| rs7537765  | 1   | 11809890  | -0.058  | 0.008 | 4.44E-13 | 0.900 |
| rs535107   | 1   | 11812055  | -0.037  | 0.006 | 2.63E-09 | 0.810 |
| rs2236797  | 1   | 11815237  | -0.046  | 0.008 | 1.12E-08 | 0.900 |
| rs2075538  | 1   | 11819189  | -0.048  | 0.010 | 7.86E-10 | 0.890 |
| rs2075539  | 1   | 11820345  | -0.046  | 0.008 | 7.23E-09 | 0.900 |
| rs1023252  | 1   | 11821620  | -0.039  | 0.009 | 8.03E-10 | 0.890 |
| rs5063     | 1   | 11830235  | -0.045  | 0.008 | 1.74E-08 | 0.900 |
| rs1801131  | 1   | 11854476  | -0.041  | 0.009 | 3.10E-11 | 0.830 |
| rs1801133  | 1   | 11856378  | 0.073   | 0.005 | 5.53E-17 | 0.550 |
| rs4846064  | 1   | 11857429  | -0.040  | 0.005 | 5.53E-17 | 0.500 |
| rs11588551 | 1   | 11864523  | 0.027   | 0.007 | 1.67E-08 | 0.560 |
| rs6667637  | 1   | 11870544  | -0.035  | 0.005 | 4.47E-13 | 0.580 |
| rs2336377  | 1   | 11872557  | 0.037   | 0.007 | 8.07E-14 | 0.620 |
| rs1321073  | 1   | 11874213  | -0.029  | 0.007 | 2.04E-09 | 0.550 |
| rs34175640 | 1   | 11874799  | -0.029  | 0.007 | 7.84E-10 | 0.550 |
| rs11800086 | 1   | 11894336  | -0.035  | 0.005 | 7.35E-13 | 0.610 |
| rs2336384  | 1   | 11968650  | 0.040   | 0.005 | 1.18E-16 | 0.580 |
| rs1836860  | 3   | 187919298 | -0.032  | 0.005 | 5.03E-09 | 0.730 |
| rs1624230  | 3   | 187921629 | -0.027  | 0.005 | 3.81E-08 | 0.650 |
| rs1648700  | 3   | 187932610 | -0.030  | 0.005 | 1.09E-08 | 0.720 |
| rs1624569  | 3   | 187932763 | -0.030  | 0.005 | 1.11E-08 | 0.720 |
| rs1836883  | 11  | 88904815  | 0.029   | 0.005 | 9.55E-10 | 0.550 |

Table S5. The association between each instrumental variable and confounding factors.

| Instrumental variable | Confounding factors (betas(standard error), p-value) |                  |                    |                   |
|-----------------------|------------------------------------------------------|------------------|--------------------|-------------------|
|                       | Smoking                                              | Drinking         | RFS                | BMI               |
| rs12567136            | 0.22(0.32),0.50                                      | -0.11(0.29),0.70 | 1.21(1.03),0.24    | -0.05(0.38),0.89  |
| rs2336377             | -0.06(0.12),0.60                                     | 0.03(0.09),0.72  | 0.10(0.31),0.75    | 0.11(0.12),0.35   |
| rs1801133             | 0.02(0.11), 0.85                                     | 0.01(0.08),0.91  | -0.54 (0.28), 0.05 | -0.05(0.11),0.62  |
| rs1624230             | -0.15(0.13),0.25                                     | 0.12(0.10),0.22  | 0.12(0.34), 0.73   | -0.19(0.13), 0.15 |
| rs1836883             | 0.16(0.11),0.13                                      | 0.03(0.08),0.73  | -0.40(0.27),0.15   | -0.08(0.10),0.44  |

RFS, recommended food score; BMI, body mass index. smoking: current smoke vs non-, ex-smoker; drinking: current drinker vs non-, ex-drinker. Analyses was adjusted for age, sex and area. Genetic model is additive.

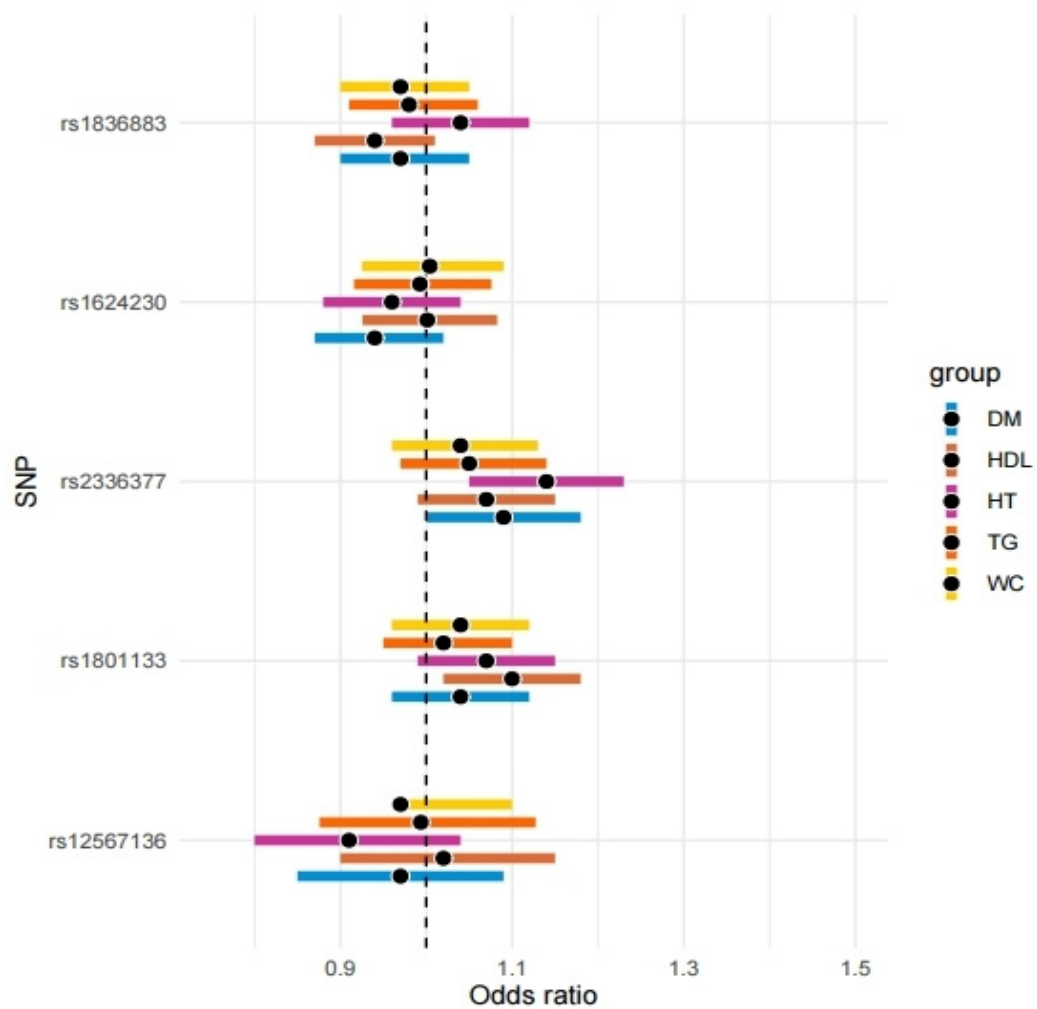

Figure S1. Odds ratio of five selected SNPs and individual components of MetS in KARE. DM, diabetes; HDL, high density lipoprotein; HT, hypertension; TG, triglyceride; WC, waist circumference.
